# Supplementary material
Source: Springer Nature journal article supplement (https://www.springermedizin.de/resource/supplementary/12913_2006_550_MOESM1_ESM.pdf/9535002)
Supplement: MOESM1 [file 9535002]

**Patients with stroke  
admitted to the  
rehabilitation ward  
N = 109**

**Not eligible  
N = 19**  
Not discharged to  
the home

**Eligible  
N = 90**

**Declined  
N = 29**  
10 well recovered  
6 choosed other  
13 gave no reason

**Randomised  
N = 61**

**Drop out  
N = 2**  
Change of mind

**Included  
N = 59**

**Home group**

**Day clinic group**

**Discharge  
N = 30**

**Discharge  
N = 29**

**3 weeks  
N = 30**

**3 weeks  
N = 29**

**3 months  
N = 30**

**3 months  
N = 29**

**Loss  
N=1**  
Declined  
Follow-up

**1 year  
N = 29**

**1 year  
N = 29**
